# Supplementary material for: Fast Nosé–Hoover thermostat: molecular dynamics in quasi-thermodynamic equilibrium
Source: Royal Society of Chemistry journal article supplement (doi:10.1039/c8cp06800c), 2019-01-01
Supplement: c8cp06800c1.pdf [file c8cp06800c1.pdf]

# SUPPORTING INFORMATION

## Fast Nosé-Hoover Thermostat: Molecular Dynamics in Quasi-thermodynamic Equilibrium

Dominik Sidler, Sereina Riniker\*

[\*] *Laboratory of Physical Chemistry, ETH Zurich, Vladimir-Prelog-Weg 2, 8093 Zurich, Switzerland*  
*Email: [sriniker@ethz.ch](mailto:sriniker@ethz.ch)*

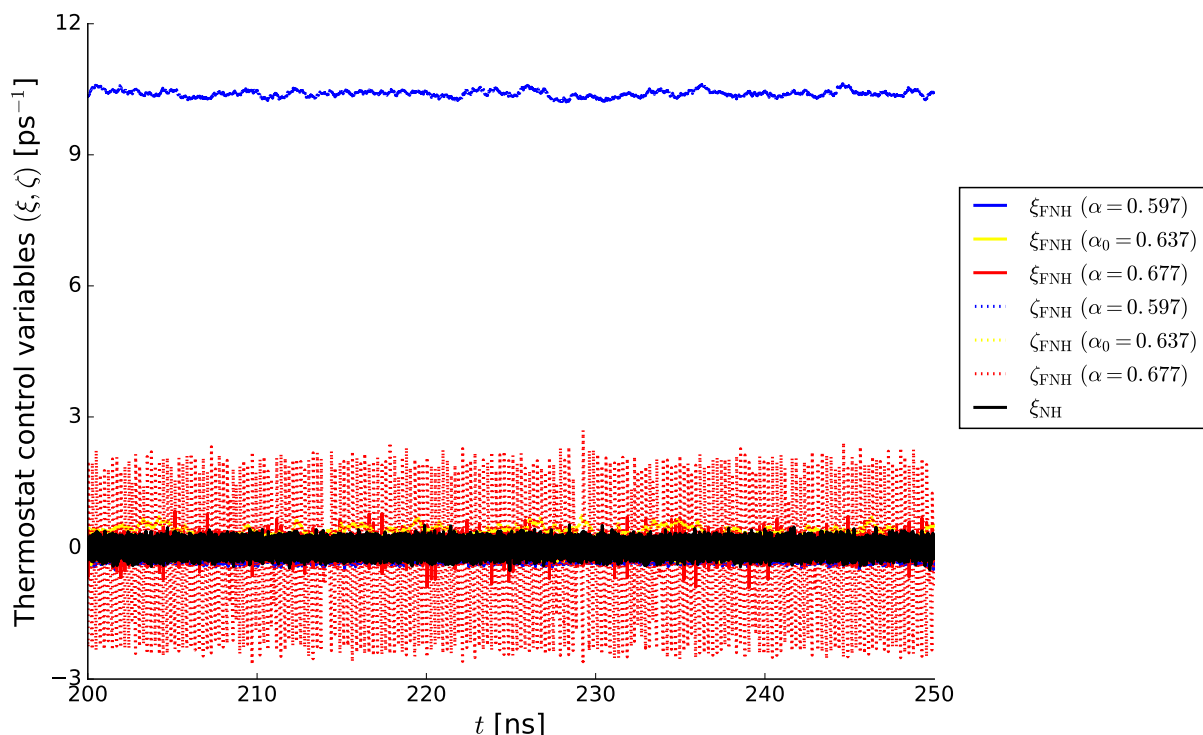

Figure S1: Time evolution of the thermostat control variables with respect to different Fast Nosé-Hoover (FNH) perturbations  $\alpha$  for peptide 1 in methanol. One can clearly recognise that positive perturbations  $\alpha = \alpha_0 + \delta\alpha$  lead to negative  $\zeta$ , which are balanced by positive  $\xi$  values, and *visa versa* for negative perturbations  $\alpha = \alpha_0 - \delta\alpha$ . For large positive deviations  $\alpha = \alpha_0 + \Delta\alpha = 0.677$  in red, the oscillations of the thermostat variables are substantially increased involving repetitive sign changes. The Nosé-Hoover (NH) reference value for canonical equilibrium is shown in black.

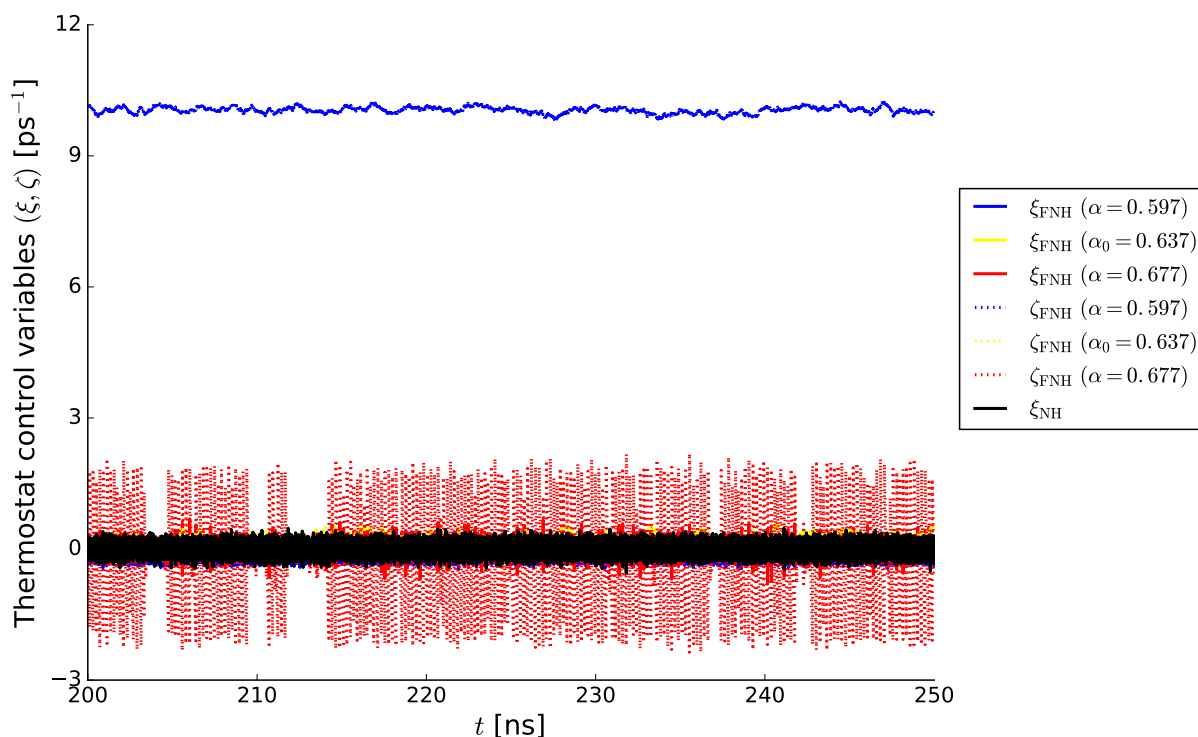

Figure S2: Time evolution of the thermostat control variables with respect to different Fast Nosé-Hoover (FNH) perturbations  $\alpha$  for peptide 2 in methanol. One can clearly recognise that positive perturbations  $\alpha = \alpha_0 + \delta\alpha$  lead to negative  $\zeta$ , which are balanced by positive  $\xi$  values, and *visa versa* for negative perturbations  $\alpha = \alpha_0 - \delta\alpha$ . For large positive deviations  $\alpha = \alpha_0 + \Delta\alpha = 0.677$  in red, the oscillations of the thermostat variables are substantially increased also involving repetitive sign changes. However, in contrast to peptide 1 and the water test system, there exist some periods with reduced oscillatory amplitudes of  $\zeta$ . The Nosé-Hoover (NH) reference value for canonical equilibrium is shown in black.
